# Supplementary material
Source: PubMed Central journal article supplement (PMC3001265)
Supplement: supp_182_10_1273__1.pdf [file supp_182_10_1273__1.pdf]

## Online Data Supplement

### Host-derived interleukin-5 promotes adenocarcinoma-induced malignant pleural effusion

Georgios T. Stathopoulos, Taylor P. Sherrill, Sophia Karabela, Kasia Goleniewska, Ioannis Kalomenidis, Charis Roussos, Barbara Fingleton, Fiona E. Yull, R. Stokes Peebles Jr., and Timothy S. Blackwell

**Supplementary Table 1.** Gene expression of Lewis lung cancer cells after 24 hours of incubation with saline or 22 pM rmIL-5. No significant changes in gene expression were induced by IL-5. Adjusted level of significance:  $P < .05$  (*ad hoc*) / 28853 (number of comparisons) =  $1.733 \times 10^{-6}$ .  $\Delta GE$ , fold change in gene expression induced by 22 pM rmIL-5.

| <i>Affymetrix Probeset ID</i> | <i><math>\Delta GE</math></i> | <i>P</i>    |
|-------------------------------|-------------------------------|-------------|
| 10341210                      | -2.07983                      | 0.000155407 |
| 10341353                      | -1.90669                      | 0.0463393   |
| 10343628                      | -1.85239                      | 0.00885216  |
| 10339479                      | -1.79559                      | 0.00390373  |
| 10341359                      | -1.78524                      | 0.0192706   |
| 10338720                      | -1.78323                      | 0.0305543   |
| 10340103                      | -1.7799                       | 0.026738    |
| 10342705                      | -1.71943                      | 0.00444225  |
| 10342970                      | -1.70722                      | 0.00190568  |
| 10341398                      | -1.70252                      | 0.0186169   |
| 10339511                      | -1.67343                      | 0.00803461  |
| 10343462                      | -1.66321                      | 0.0345591   |
| 10342803                      | -1.65726                      | 0.00863342  |
| 10340623                      | -1.6511                       | 0.000812849 |
| 10343872                      | -1.64801                      | 0.0289081   |
| 10342031                      | -1.64425                      | 0.0122719   |
| 10343549                      | -1.61672                      | 0.013231    |
| 10341940                      | -1.55966                      | 0.0433129   |
| 10341467                      | -1.55898                      | 0.00304853  |
| 10340616                      | -1.54663                      | 0.0489859   |
| 10340317                      | -1.54252                      | 0.0290594   |
| 10344096                      | -1.54127                      | 0.0331862   |
| 10342487                      | -1.51282                      | 0.0264627   |
| 10340679                      | -1.5083                       | 0.021617    |
| 10341454                      | 1.50309                       | 0.0357003   |
| 10339543                      | 1.50428                       | 0.0418064   |
| 10339116                      | 1.50839                       | 0.0428513   |
| 10341800                      | 1.50974                       | 0.029728    |
| 10340158                      | 1.51132                       | 0.0322329   |
| 10344068                      | 1.51428                       | 0.0469952   |
| 10342873                      | 1.51535                       | 0.0224996   |
| 10340496                      | 1.51696                       | 0.0317885   |
| 10342285                      | 1.51767                       | 0.0017915   |
| 10341815                      | 1.5194                        | 0.0292556   |
| 10339564                      | 1.52208                       | 0.0257002   |
| 10338161                      | 1.52345                       | 0.0224139   |
| 10338886                      | 1.52485                       | 0.0265639   |
| 10340284                      | 1.52722                       | 0.0250351   |
| 10341093                      | 1.53288                       | 0.0230356   |
| 10338997                      | 1.53691                       | 0.00734256  |

|          |         |             |
|----------|---------|-------------|
| 10338258 | 1.5403  | 0.042514    |
| 10339446 | 1.54746 | 0.0296148   |
| 10341602 | 1.54908 | 0.0377937   |
| 10341653 | 1.55021 | 0.000743042 |
| 10341721 | 1.55168 | 0.0230421   |
| 10343116 | 1.55262 | 0.0161803   |
| 10339646 | 1.55712 | 0.0351343   |
| 10343593 | 1.56328 | 0.0348556   |
| 10342876 | 1.56663 | 0.0436713   |
| 10344095 | 1.56778 | 0.00609033  |
| 10344117 | 1.56835 | 0.0352524   |
| 10342526 | 1.56959 | 0.027258    |
| 10340989 | 1.57296 | 0.0458452   |
| 10343209 | 1.57315 | 0.0119869   |
| 10341293 | 1.5744  | 0.0495925   |
| 10342535 | 1.5749  | 0.00796239  |
| 10342418 | 1.57753 | 0.0478459   |
| 10343782 | 1.58284 | 0.0493901   |
| 10339429 | 1.58358 | 0.0441074   |
| 10338238 | 1.58467 | 0.0159061   |
| 10340526 | 1.58961 | 0.0418818   |
| 10343793 | 1.59239 | 0.00940803  |
| 10340577 | 1.59274 | 0.0425718   |
| 10339998 | 1.59505 | 0.0164694   |
| 10342144 | 1.6053  | 0.0022805   |
| 10339269 | 1.61857 | 0.00338332  |
| 10339677 | 1.63056 | 0.0408487   |
| 10344085 | 1.63112 | 0.0370942   |
| 10338895 | 1.63163 | 0.0428518   |
| 10341012 | 1.63462 | 0.0355319   |
| 10338250 | 1.63789 | 0.0417547   |
| 10341357 | 1.6411  | 0.00946866  |
| 10341410 | 1.64775 | 0.0151134   |
| 10339628 | 1.65379 | 0.0216482   |
| 10341919 | 1.66757 | 0.00789505  |
| 10344264 | 1.66899 | 0.0469876   |
| 10343148 | 1.67663 | 0.00586254  |
| 10343235 | 1.67704 | 0.00720929  |
| 10340583 | 1.67841 | 0.0356176   |
| 10338432 | 1.68166 | 0.0312474   |
| 10339234 | 1.68792 | 0.0441162   |
| 10340098 | 1.69088 | 0.0346975   |
| 10338187 | 1.69242 | 0.0158717   |
| 10340746 | 1.69579 | 0.0271573   |
| 10338794 | 1.71747 | 0.0398851   |
| 10343210 | 1.72244 | 0.0130012   |

|          |         |             |
|----------|---------|-------------|
| 10338857 | 1.72269 | 0.0254156   |
| 10344580 | 1.72618 | 0.00422919  |
| 10344061 | 1.72649 | 0.00828588  |
| 10341813 | 1.73228 | 0.0122626   |
| 10339303 | 1.7332  | 0.0289371   |
| 10338414 | 1.73612 | 0.00977282  |
| 10341521 | 1.73822 | 0.0142351   |
| 10339668 | 1.74636 | 0.0249786   |
| 10343957 | 1.74892 | 0.0114094   |
| 10339033 | 1.76745 | 0.0281065   |
| 10342062 | 1.7768  | 0.0339842   |
| 10343877 | 1.77836 | 0.0372624   |
| 10338700 | 1.78521 | 0.0396419   |
| 10341211 | 1.79137 | 0.0371974   |
| 10338417 | 1.7983  | 0.0382119   |
| 10338303 | 1.80322 | 0.0137312   |
| 10339490 | 1.80423 | 0.0061599   |
| 10340280 | 1.80721 | 0.02079     |
| 10338756 | 1.80896 | 0.0102024   |
| 10340337 | 1.81795 | 0.0169445   |
| 10341750 | 1.82176 | 0.0023629   |
| 10339832 | 1.82449 | 0.0187162   |
| 10343007 | 1.82937 | 0.0180884   |
| 10341317 | 1.84473 | 0.0282066   |
| 10339914 | 1.84525 | 0.0249933   |
| 10339001 | 1.84534 | 0.0105515   |
| 10342275 | 1.84558 | 0.00959874  |
| 10339930 | 1.84709 | 0.00909966  |
| 10338478 | 1.85037 | 0.0186569   |
| 10339579 | 1.86831 | 0.00709304  |
| 10342185 | 1.87407 | 0.0267704   |
| 10342214 | 1.88149 | 0.012501    |
| 10339942 | 1.91501 | 0.0139258   |
| 10340411 | 1.92446 | 0.00747026  |
| 10340724 | 1.92482 | 0.0250155   |
| 10338884 | 1.93348 | 0.00592814  |
| 10339743 | 1.94737 | 0.040844    |
| 10344538 | 1.96625 | 0.00828673  |
| 10338639 | 2.00404 | 0.00753723  |
| 10342279 | 2.02883 | 0.00355771  |
| 10343834 | 2.04416 | 0.0256672   |
| 10341978 | 2.04758 | 0.00533303  |
| 10344513 | 2.0635  | 0.000751615 |
| 10339618 | 2.07443 | 0.0453189   |
| 10341184 | 2.121   | 0.0279251   |
| 10342132 | 2.12788 | 0.0340778   |

|          |         |            |
|----------|---------|------------|
| 10341368 | 2.17703 | 0.00443723 |
| 10342364 | 2.17891 | 0.0137549  |
| 10343651 | 2.18676 | 0.047059   |
| 10341488 | 2.19042 | 0.0373971  |
| 10343645 | 2.19253 | 0.044078   |
| 10341037 | 2.22633 | 0.0401524  |
| 10341338 | 2.30682 | 0.0124736  |

## DETAILED MATERIALS AND METHODS

**Reagents:** rmIL-5 was from R&D Systems (Minneapolis, MN); 3-(4,5-dimethylthiazol-2-yl)-5-(3-carboxymethoxyphenyl)-2-(4-sulfophenyl)-2H-tetrazolium, inner salt (MTS) assay from Promega (Madison, WI); anti-proliferating cell nuclear antigen (PCNA) antibody from SantaCruz Biotechnology (Santa Cruz, CA); terminal deoxynucleotidyl nick-end labeling (TUNEL) kit from Roche Molecular Biochemicals (Penzberg, Germany); anti-factor VIII-related antigen (fVIIIra) antibody from Invitrogen (San Francisco, CA); Biebrich's scarlet from Sigma Chemical (St Louis, MO); and phycoerythrin-Cy7-conjugated anti-CD11b and allophycocyanin-conjugated anti-Gr1 antibodies from BD Pharmingen (Palo Alto, CA). TRFK5 rat anti-mouse IL-5 antibody was prepared from the supernatants of TRFK5 hybridoma as described previously (E1). Rat IgG<sub>2a</sub> was from Peprotech EC (London, UK).

**Human Pleural Effusions:** Pleural fluid and matched serum were obtained during the initial diagnostic thoracenteses performed in 55 consecutive patients with MPE (causative neoplasms: 10 non-small cell lung cancers, 21 adenocarcinomas, 3 small cell lung cancers, 1 large cell lung cancer, 6 mesotheliomas, 7 breast adenocarcinomas, 1 each of gastric adenocarcinoma, thyroid adenocarcinoma, Hodgkin's and non-Hodgkin's lymphoma, chronic myelomonocytic and lymphocytic leukemia, and adenocarcinoma of unknown primary), and in 20 patients with congestive heart failure (CHF) who were treated at the General Hospital Evangelismos, Athens, Greece, from September 2006 through May 2008. The study was approved by the ethics committee of the hospital, and all patients gave written informed consent. Human MPE fluids and matched sera were handled as described

previously (E2,E3). MPE was diagnosed by positive pleural fluid cytology or pleural tissue histology (E4,E5). Pleural effusion due to CHF was diagnosed using a constellation of clinical, radiologic, and laboratory findings, including: 1) transudative effusion, 2) echocardiographic evidence of left ventricular dysfunction, 3) serum pro-brain natriuretic peptide levels above 1500 pg/ml, 4) increased heart size on the chest X-ray, 5) negative pleural fluid bacteriology and cytology, and 6) improvement with diuretic and/or inotropic drugs (E6).

***Animal Models:*** *il5*<sup>+/+</sup> and *il5*<sup>-/-</sup> mice generated on a C57BL/6 background (E7) were purchased from the Jackson Laboratory (Bar Harbor, MN) or the Biomedical Sciences Research Center Alexander Fleming (Vari, Greece) and inbred at the Animal Care facilities of Vanderbilt University Medical Center (Nashville, TN) or the General Hospital Evangelismos (Athens, Greece). Animal care and experimental procedures were approved by the Institutional Animal Care and Use Committee at Vanderbilt University or the Veterinary Administration Bureau of the Prefecture of Athens, Greece, and were conducted according to International Animal Care and Use Guidelines (<http://grants.nih.gov/grants/olaw/GuideBook.pdf>). Mice used for experiments were sex-, weight (19-24 g)-, and age (8-10 week)-matched. For MPE generation, intrapleural injections of LLC and MC38 cells ( $1.5 \times 10^5/50 \mu\text{l}$  PBS/mouse) (day 0), as well as sacrifice and specimen collection (day 14 after LLC and day 11 after MC38 cells) were performed as described previously (E2,E3,E8). For subcutaneous tumor formation, LLC or MC38 cells ( $5 \times 10^5/50 \mu\text{l}$  PBS/mouse) were injected into the dermis of the rear flank. Three vertical tumor dimensions ( $\delta_1$ ,  $\delta_2$ ,  $\delta_3$ ) were measured weekly, and tumor volume (V) was determined using the formula  $V = \pi \times (\delta_1 \times \delta_2 \times \delta_3) / 6$ .

***Bioluminescence imaging:*** Serial bioluminescence imaging of live mice bearing *pNGL* LLC or MC38-induced MPEs was done using intravenous injection of 1 mg D-luciferin, and of cultured *pNGL* LLC or MC38 cells using addition of 10 mM D-luciferin. Imaging was performed using a Xenogen IVIS cooled charged couple device (Xenogen, Alameda, CA). Data were analyzed using Living Image v.2.50 (Xenogen) and IgorPro (Wavemetrics, Lake Oswego, OR) (E2,E3,E8).

***Cell Culture:*** LLC mouse and A549 human lung adenocarcinoma, and mouse skin melanoma (B16F10) cells were purchased from the American Type Culture Collection (ATCC, Manassas, VA) and MC38 colon adenocarcinoma cells from the Tumor Repository of the National Cancer Institute (Frederick, MD). Cells were cultured at 37<sup>0</sup>C in 5% CO<sub>2</sub>-95% air using Dulbecco's modified Eagle's medium (DMEM) 10% fetal calf serum (FCS) supplemented with glutamine and 100 mg/l penicillin/streptomycin. *pNGL* MC38 cells stably expressing a NF- $\kappa$ B reporter (NF- $\kappa$ B.GFP.LUC; *pNGL*) were generated similar to *pNGL* LLC cells, as has been described elsewhere (E8).

***Cytokine determinations:*** Mouse and human IL-5 (detection limits: 7.0 and 3.0 pg/ml, respectively), mouse VEGF (detection limit: 31.3 pg/ml), mouse monocyte chemoattractant protein (MCP)-5 (detection limit: 3.0 pg/ml), and mouse macrophage inflammatory protein (MIP)-2 (detection limit: 15.6 pg/ml) were determined using commercial enzyme-linked immunosorbent assay (ELISA) kits (R&D Systems and Peprotech EC). Mouse tumor necrosis factor (TNF)- $\alpha$ , interferon (IFN)- $\gamma$ , (MCP)-1, and IL-6, IL-10, and IL-12p70 were measured using a cytometric bead array (CBA; BD, San Diego, CA) (detection limits: 7.3, 2.5, 52.7, 5.0, 17.5, and 10.7 pg/ml,



respectively) (E2,E3,E8). Cellular expression levels of these proteins were normalized for total protein.

***In vivo delivery of exogenous rmIL-5:*** Forty ng rmIL-5 in 100 µl phosphate-buffered saline (PBS) or PBS alone (control) were delivered intravenously to the retro-orbital veins of mice at days 2, 4, 6, 8, 10, and 12 after LLC cells, a regimen previously shown to effectively reconstitute endogenous levels of the cytokine in *il5*<sup>-/-</sup> mice (E9).

***In vivo IL-5 neutralization:*** For *in vivo* IL-5 neutralization, mice with LLC-induced MPE received intraperitoneal injections of 1 mg/kg TRFK5 in 100 µl PBS (rat IgG<sub>2a</sub> served as control), a dose reported to achieve steadily effective levels of circulating antibody (E10). Mice were treated with TRFK5 in two protocols: a “prevention” protocol on days 0 and 8 after LLC cells and a “regression” protocol on day 8 after tumor cells. This latter study design was aimed at unveiling potential therapeutic effects of TRFK5 against already established MPE, since they develop around day 8 in the original mouse model (E8,E11).

***Pleural tumor enumeration and processing:*** Pleural tumors were enumerated by three independent and blinded readers under a dissecting microscope, and the average number was used for analyses.

***Histology:*** Mouse lungs and attached tumors were fixed in 10% neutrally buffered formalin (24 hours) and 70% ethanol (3 days). Tumors were dissected and embedded in paraffin. 5-µm-thick sections were cut, mounted on glass slides, and stained with hematoxylin and eosin. Alternatively, tissue sections were immunostained using antibodies for PCNA, TUNEL, and fVIIIra, and immune-

labeling was quantified, as described previously (E2,E3,E8,E11), or stained with Biebrich's scarlet for eosinophils using Luna's technique (E12).

***Polymerase chain reaction (PCR) and gene expression profiling:*** Total RNA from PBS or rmIL-5-treated (1 ng/ml = 22 pM = KDa for binding of IL-5 to its receptor IL5R) LLC cells (pooled samples from triplicates from three independent experiments) was isolated by homogenization in ice-cold Trizol reagent (Invitrogen, Carlsbad, CA) followed by a single passage through an RNAeasy column (Qiagen, Hilden, Germany). Isolated total RNA was reverse transcribed with Superscript Reverse Transcriptase II (Invitrogen), and the cDNA was indirectly labeled using the amino-allyl cDNA labeling method. Primers and conditions used for PCR were: sense 5'-GCCCTTTGATCAGCTGTTCAGTCCAC-3'; antisense 3'-CTGGTCCAACAAAGGTGGCCAAGGC-5'; 35 cycles with an annealing temperature of 61 °C, as described previously (E13). For microarray, experimental samples were mixed with isomolar amounts of the baseline sample (which was used as a common reference sample throughout) and hybridized in triplicates to cDNA glass microarray slides (GeneChip Mouse Gene 1.0 ST Arrays, Affymetrix, Santa Clara, CA) interrogating 28853 genes. After image analysis, all microarray data were subjected to preprocessing, Lowess normalization, centering, and/or averaging. To select differentially expressed genes, we employed both a parametric and a nonparametric ANOVA (Kruskal-Wallis), using proprietary algorithms implemented in MATLAB v7.1.14 (MathWorks, Natick, MA). No filtering criteria were applied and gene expression was directly compared between groups. Validation of 20 genes was performed at the RNA and protein levels using RT-PCR, ELISA, Western blot, and/or CBA, as appropriate. Microarray data are available in the ArrayExpress database ([www.ebi.ac.uk/arrayexpress](http://www.ebi.ac.uk/arrayexpress)) under accession number E-MEXP-2490.

**Cytology:** 50,000 pleural fluid cells were used for cytocentrifugal specimen (cytospin) preparation. The slides were air dried, fixed in methanol for 10 s, and stained with May-Gruenwald-Giemsa. Distinct cell types were enumerated as a percentage of 500 cells on the slide.

**Biochemical and cellular assays:** Protein was determined using the Bio-Rad protein assay (Hercules, CA). A MTS assay was used to assess cell viability (Promega). For cell experiments, cells were plated at equal densities in 12- or 96-well culture dishes. Indicated treatments were applied when cells were 20-30% confluent. All cell experiments were done in triplicate.

**Flow cytometry:** After red blood cell lysis using 30-minute exposure to 1% NH<sub>4</sub>Cl, blood and pleural fluid cells were suspended in PBS 1% bovine serum albumin, stained with phycoerythrin-Cy7-conjugated anti-CD11b and allophycocyanin-conjugated anti-Gr1 antibodies at 0.1 µg/10<sup>6</sup> cells for 60 minutes, were fixed in 1 % paraformaldehyde, and were analyzed by flow cytometry for CD11b and Gr1 expression using a FACS-SCAN automated flow cytometer (Becton-Dickinson, Palo Alto, CA). Flow cytometric data were analyzed using Windows Multiple Document Interface for Flow Cytometry (WinMDI) v2.8 (J. Trotter, The Scripps Research Institute, La Jolla, CA; freely available at <http://facs.scripps.edu/software.html>).

**Statistical analysis:** All values given represent mean ± SEM. Intergroup differences in frequencies, means, and medians were examined by  $\chi^2$  test, t-test or one-way ANOVA with LSD post-hoc tests, and Mann-Whitney or Kruskal-Wallis test with Dunn's post-hoc tests, respectively. All *P* values are two-tailed; *P* values < 0.05 were considered significant. All statistical analyses were performed using the Statistical

Package for the Social Sciences v.13.0.0 (SPSS, Chicago, IL).

## REFERENCES TO ONLINE DATA SUPPLEMENT

- E1 Schumacher JH, O'Garra A, Shrader B, van Kimmenade A, Bond MW, Mosmann TR, Coffman RL. The characterization of four monoclonal antibodies specific for mouse IL-5 and development of mouse and human IL-5 enzyme-linked immunosorbent. *J Immunol* 1988;141:1576-81.
- E2 Stathopoulos GT, Kollintza A, Moschos C, Psallidas I, Sherrill TP, Pitsinos EN, Vassiliou S, Karatza M, Papiris SA, Graf D, Orphanidou D, Light RW, Roussos C, Blackwell TS, Kalomenidis I. Tumor necrosis factor- $\alpha$  promotes malignant pleural effusion. *Cancer Res* 2007;67:9825-9834.
- E3 Stathopoulos GT, Psallidas I, Moschos C, Moustaki A, Kollintza A, Karabela S, Porfyridis I, Vassiliou S, Karatza M, Zhou Z, Joo M, Blackwell TS, Roussos C, Graf D, Kalomenidis I. A central role for tumor-derived monocyte chemoattractant protein-1 in malignant pleural effusion. *J Natl Cancer Inst* 2008;100:1464-76
- E4 Antony VB, Loddenkemper R, Astoul P, et al. Management of malignant pleural effusions. *Am J Respir Crit Care Med* 2000;162:1987-2001.
- E5 Antunes G, Neville E, Duffy J, Ali N, on behalf of the BTS Pleural Disease Group, a subgroup of the BTS Standards of Care Committee. BTS guidelines for the management of malignant pleural effusions. *Thorax* 2003;58:ii29-ii38.
- E6 Porcel JM. Establishing a diagnosis of pleural effusion due to heart failure. *Respirology* 2009;14:471-3.

- E7 Kopf M, Brombacher F, Hodgkin PD, Ramsay AJ, Milbourne EA, Dai WJ, Ovington KS, Behm CA, Köhler G, Young IG, Matthaei KI. IL-5-deficient mice have a developmental defect in CD5+ B-1 cells and lack eosinophilia but have normal antibody and cytotoxic T cell responses. *Immunity* 1996;4:15-24.
- E8 Stathopoulos GT, Zhu Z, Everhart MB, et al. Nuclear factor- $\kappa$ B affects tumor progression in a mouse model of malignant pleural effusion. *Am J Respir Cell Mol Biol* 2006;34:142-50.
- E9 Schwarze J, Cieslewicz G, Hamelmann E, Joetham A, Shultz LD, Lamers MC, Gelfand EW. IL-5 and eosinophils are essential for the development of airway hyperresponsiveness following acute respiratory syncytial virus infection. *J Immunol* 1999;162:2997-3004.
- E10 Garlisi CG, Kung TT, Wang P, Minnicozzi M, Umland SP, Chapman RW, Stelts D, Crawley Y, Falcone A, Myers JG, Jones H, Billah MM, Kreutner W, Egan RW. Effects of chronic anti-interleukin-5 monoclonal antibody treatment in a murine model of pulmonary inflammation. *Am J Respir Cell Mol Biol* 1999;20:248-55.
- E11 Stathopoulos GT, Moschos C, Loutrari H, Kollintza A, Psallidas I, Karabela S, Magkouta S, Papiris SA, Roussos C, Kalomenidis I. Zoledronic acid is effective against experimental malignant pleural effusion. *Am J Respir Crit Care Med* 2008;178:50-59.
- E12 Eversole RR, Mackenzie CD, Beuving LJ. A Photoreactive Fluorescent Marker for Identifying Eosinophils and Their Cytoplasmic Granules in Tissues. *J Histochem Cytochem* 2003;51:253-7.

E13 Orlic D, Anderson S, Biesecker LG, Sorrentino BP, Bodine DM. Pluripotent hematopoietic stem cells contain high levels of mRNA for c-kit, GATA-2, p45 NF-E2, and c-myb and low levels or no mRNA for c-fms and the receptors for granulocyte colony-stimulating factor and interleukins 5 and 7. *Proc Natl Acad Sci USA* 1995;92:4601-4605.
